# Supplementary material for: In silico testing of flavonoids as potential inhibitors of protease and helicase domains of dengue and Zika viruses
Source: PeerJ. 2022 Aug 4;10:e13650. doi: 10.7717/peerj.13650 (PMC9357371; doi:10.7717/peerj.13650)
Supplement: Supplemental Information 8 [file peerj-10-13650-s008.docx]

Table S1. Accession code of the polyprotein sequence for DENV and ZIKV

| Region | Serotype | ID sequence | Region | Serotype | ID sequence | Region | Serotype | ID sequence |
| --- | --- | --- | --- | --- | --- | --- | --- | --- |
| **Africa** | DENV1 | AGW21594 | **Asia** | DENV1 | BBG31501 | **Europa** | DENV1 | CCG93466 |
| AXS75992 | AUW27526 | AIN75463 |
| ANC57584 | AXX75607 | AVY51407 |
| AAK60418 | AXX75606 | - |
| ABC07332 | AUW27528 | - |
| ABC07331 | AUW27527 | - |
| DENV2 | AVH78234 | DENV2 | AXU25276 | DENV2 | AVY51408 |
| AVH78235 | AXU25284 | AED98520 |
| AVH78236 | BBG31505 | - |
| AVH78237 | BBG31506 | - |
| AVH78239 | BBG31509 | - |
| AVQ12083 | AZS59400 | - |
| DENV3 | ACQ44384 | DENV3 | BBG31513 | DENV3 | - |
| ANC57608 | AXX75610 | - |
| - | AXX75611 | - |
| - | ASK05287 | - |
| - | ASX95468 | - |
| - | BBG31511 | - |
| DENV4 | AVY51410 | DENV4 | BBG31520 | DENV4 | - |
| AHK05342 | BBG31521 | - |
| - | BBG31514 | - |
| - | BBG31515 | - |
| - | BBG31516 | - |
| - | BBG31517 | - |
| ZIKV | QDH45910 | ZIKV | BBC70847 | ZIKV | AMS00611 |
| AEN75265 | AZS35407 | AMN14619 |
| AMR68906 | QGA72951 | ART29823 |
| AZS35403 | QDZ58858 | ART29825 |
| AZS35404 | AVG19203 | ART29828 |
| AZS35405 | APH11587 | AOX49265 |
|  |  |  |  |  |  |  |  |  |
| **N. America** | DENV1 | ACW82969 | **Oceania** | DENV1 | AVM80382 | **S. America** | DENV1 | AXB26588 |
| ADA60793 | AYP31256 | AXB26592 |
| ALJ53459 | AYP31257 | AXB26594 |
| AHI43751 | AXS75990 | AKQ00017 |
| AHC98425 | AMN88557 | AUN35113 |
| AHC98426 | AFY10029 | AUN35112 |
| DENV2 | AOE23002 | DENV2 | AYO90660 | DENV2 | AWI47685 |
| APW84878 | AYO90661 | AWK29893 |
| AHI43964 | ANY58850 | AWK29892 |
| AHI43753 | ANY58849 | AUN35129 |
| ANC57593 | ACQ44517 | AUN35128 |
| AOE23003 | ANT47238 | AUN35135 |
| DENV3 | AHC98449 | DENV3 | AVD96674 | DENV3 | AXG22240 |
| AHC98450 | AVD96676 | AXB26587 |
| AHC98451 | AVD96677 | AXB26589 |
| AHC98457 | AVD96678 | AXB26590 |
| AHC98458 | AFN80339 | AXB26602 |
| ACQ44481 | AVD96675 | ACO06174 |
| DENV4 | ALJ53458 | DENV4 | AXG50965 | DENV4 | AUN35144 |
| AMW17747 | AFY10033 | AKQ00034 |
| ACQ44406 | AFY10039 | AKQ00035 |
| ACQ44407 | AFY10037 | AKQ00036 |
| ACQ44408 | AFY10035 | AKQ00037 |
| ACH61714 | AFY10036 | AXB26600 |
| ZIKV | AMQ34003 | ZIKV | AOI20067 | ZIKV | ARU07076 |
| AMQ34004 | ANO46309 | ARU07075 |
| AQW34707 | ANO46307 | AML81028 |
| APB03021 | ANO46303 | AZS35360 |
| AOS90221 | AVG19275 | AZS35374 |
| ASL68979 | ARB08102 | APY24200 |
