# Supplementary material for: In silico testing of flavonoids as potential inhibitors of protease and helicase domains of dengue and Zika viruses
Source: PeerJ. 2022 Aug 4;10:e13650. doi: 10.7717/peerj.13650 (PMC9357371; doi:10.7717/peerj.13650)
Supplement: Supplemental Information 18 [file peerj-10-13650-s018.xlsx]

## Sheet: Libro1
Supplementary information for
In silico testing of flavonoids as potential inhibitors of protease and helicase domains of dengue and Zika viruses
Omar Cruz-Arreola1, Abdú Orduña-Díaz2, Fabiola Domínguez3, Julio Reyes-Leyva1, Verónica Vallejo-Ruiz1, Lenin Domínguez-Ramírez4*, Gerardo Santos-López1*.
1Laboratorio de Biología Molecular y Virología, Centro de Investigación Biomédica de Oriente, Instituto Mexicano del Seguro Social, Metepec, Atlixco, Puebla, México.
2Centro de Investigación en Biotecnología Aplicada (CIB, Instituto Politécnico Nacional, Tepetitla, Tlaxcala, México.
3Laboratorio de Biotecnología de Productos Naturales, Centro de Investigación Biomédica de Oriente, Instituto Mexicano del Seguro Social, Metepec, Atlixco, Puebla, México.
4Department of Chemical and Biological Sciences, School of Sciences, Universidad de las Américas Puebla, San Andrés Cholula, Puebla, Mexico.
*Corresponding Author
Dr. Lenin Domínguez-Ramírez	Gerardo Santos-López
julio.dominguez@udlap.mx	gerardo.santos.lopez@gmail.com
Supplementary data resulting from the binding energy (kcal/mol) of the molecular docking obtained by ADFR for NS3-hel with our 20 ligands
Molecule name	Molecule abbreviation	Molecule code	DENV2 (2BMF)			DENV4 (2JLS)			ZIKV (5TXG)
			Binding energy	SD	Cluster	Binding energy	SD	Cluster	Binding energy	SD	Cluster
			kcal/mol		size	kcal/mol		size	kcal/mol		size
3,5-Dicaffeoylquinic Acid	DCA01	6474310	-9.7	0.7	26	-10.3	0.7	35	-10	1.2	7
Caffeic Acid	CAA02	689043	-6	0.2	210	-5.9	0.2	315	-6.1	0.2	459
5-O-Caffeoylquinic Acid	CFA03	5280633	-8	0.6	45	-8	0.5	171	-7.7	0.3	46
Luteolin-7-O-Glucoside	LNG04	5280637	-8.4	0.2	81	-8.7	0.4	78	-9	0.3	89
Quercetin 3-Rutinoside	QNR05	5280805	-7.6	0.5	20	-10	0.7	33	-8.8	0.6	11
Chicoric Acid	CHA06	5281764	-8.3	0.5	37	-6.8	0.6	79	-7.6	0.5	34
Quercetin 3,4'-O-Diglucoside	QND07	5320835	-6.5	0.5	58	-7.8	0.5	59	-7.8	0.9	49
Kaempferitrin	KFN08	5486199	-9.1	0.3	100	-8	0.2	109	-8.7	0.4	54
4,5-Di-O-Caffeoylquinic Acid	DCA09	6474309	-9.7	0.8	73	-9	0.8	74	-8.8	0.5	22
Quercetin 3,7-Diglucoside	QND10	10121947	-10.2	0.7	120	-8	0.5	42	-8.7	0.9	18
Quercetin 3-Diglucoside	QND11	10211337	-7.7	0.6	32	-8.5	0.7	55	-7.4	0.6	14
Quercetin 7,4'-Diglucoside	QND12	11968881	-8.2	0.5	63	-9.7	0.8	67	-10.3	0.7	59
Luteolin-7-O-Rutinoside	LNR13	14032966	-9.4	1	55	-9	0.5	46	-8.7	0.6	15
Quercetin 3,5-O-Diglucoside	QND14	44229098	-7.5	0.6	51	-7.9	0.7	53	-7.8	0.6	26
Luteolin 7,3'-Diglucoside	LND15	44258089	-9.2	0.6	48	-7.4	0.4	27	-8.4	0.5	26
Luteolin 7,4'-Diglucoside	LND16	44258093	-8.1	0.4	70	-8.8	0.8	56	-9.7	0.7	81
Luteolin 3',4'-Diglucosid	LND17	44258099	-10	0.6	38	-10.2	0.7	29	-8	0.8	25
Quercetin 3,3'-Diglucoside	QND18	44259153	-7.1	0.6	37	-8.1	0.7	42	-7.3	0.6	24
Kaempferol 3-Glucoside	KFG19	5282102	-8.5	0.5	132	-9.1	0.7	105	-7.9	0.5	142
Quercetin 3-Galactoside	QNG20	5281643	-8.5	0.5	114	-7.6	0.4	95	-7.2	0.4	87
Supplementary data resulting from the binding energy (kcal/mol) of the molecular docking obtained by ADFR for NS3-pro with our 20 ligands
Molecule name	Molecule abbreviation	Molecule code	DENV1 (3L6P)			DENV2 (2FOM)			DENV3 (3U1I)			DENV4 (5YVV)			ZIKV (5YOD)
			Binding energy	SD	Cluster	Binding energy	SD	Cluster	Binding energy	SD	Cluster	Binding energy	SD	Cluster	Binding energy	SD	Cluster
			kcal/mol		size	kcal/mol		size	kcal/mol		size	kcal/mol		size	kcal/mol		size
3,5-Dicaffeoylquinic Acid	DCA01	6474310	-9.1	0.5	74	-6.8	0.4	74	-9.7	0.7	48	-8.5	0.5	103	-6.6	0.4	35
Caffeic Acid	CAA02	689043	-5.7	0.2	441	-5	0.2	190	-6	0.2	493	-6	0.2	461	-4.4	0.1	156
5-O-Caffeoylquinic Acid	CFA03	5280633	-6.6	0.3	230	-5.3	0.2	163	-7	0.3	104	-6.4	0.3	116	-6.1	0.4	86
Luteolin-7-O-Glucoside	LNG04	5280637	-7.9	0.2	275	-7.7	0.4	304	-8.2	0.4	102	-8.8	0.3	225	-7.9	0.3	108
Quercetin 3-Rutinoside	QNR05	5280805	-7.6	0.6	43	-6	0.4	33	-9.2	0.7	27	-10.3	0.7	36	-7.9	0.6	31
Chicoric Acid	CHA06	5281764	-7.6	0.5	62	-5.3	0.4	23	-8.2	0.6	103	-7.1	0.8	48	-6	0.7	65
Quercetin 3,4'-O-Diglucoside	QND07	5320835	-6.8	0.8	77	-6.1	0.4	68	-6.2	0.5	90	-8.5	0.7	61	-8.2	0.9	44
Kaempferitrin	KFN08	5486199	-7.8	0.2	158	-7.4	0.4	101	-8.5	0.4	64	-8.8	0.4	122	-8.1	0.5	47
4,5-Di-O-Caffeoylquinic Acid	DCA09	6474309	-8.6	0.4	107	-6.3	0.4	125	-8.5	0.6	53	-8.1	0.8	44	-8.2	0.7	66
Quercetin 3,7-Diglucoside	QND10	10121947	-6.5	0.3	60	-4.8	0.3	51	-7.5	0.6	25	-10.8	1	77	-7.8	0.7	49
Quercetin 3-Diglucoside	QND11	10211337	-6.9	0.6	66	-5.7	0.5	79	-7.6	1	24	-6.9	0.8	42	-7.1	0.5	23
Quercetin 7,4'-Diglucoside	QND12	11968881	-8.7	0.7	170	-7.7	0.6	108	-8.4	0.6	46	-7.5	0.4	95	-7.8	0.5	82
Luteolin-7-O-Rutinoside	LNR13	14032966	-7.8	0.6	91	-6.7	0.7	37	-7.8	0.6	27	-7.8	0.6	40	-8.4	0.8	18
Quercetin 3,5-O-Diglucoside	QND14	44229098	-6.5	0.5	149	-5.7	0.6	51	-6.7	0.3	72	-7.5	0.7	70	-8.1	0.7	116
Luteolin 7,3'-Diglucoside	LND15	44258089	-8.4	0.5	141	-7.6	0.5	98	-7.8	0.4	36	-9.5	0.7	61	-7.9	0.5	49
Luteolin 7,4'-Diglucoside	LND16	44258093	-8.4	0.6	215	-7.7	0.7	164	-8.1	0.5	35	-9.1	0.6	78	-7.6	0.7	113
Luteolin 3',4'-Diglucosid	LND17	44258099	-7.6	0.6	47	-6.6	0.6	64	-8	0.8	29	-9.3	0.7	57	-8.4	0.9	46
Quercetin 3,3'-Diglucoside	QND18	44259153	-6.2	0.5	171	-6.6	0.7	45	-8	0.6	23	-7.5	0.5	43	-7.2	0.6	64
Kaempferol 3-Glucoside	KFG19	5282102	-6.9	0.4	275	-5.7	0.2	176	-7	0.2	79	-7.8	0.4	104	-7.5	0.5	237
Quercetin 3-Galactoside	QNG20	5281643	-6.5	0.3	258	-5.8	0.3	152	-7.8	0.4	80	-8.6	0.6	97	-6.9	0.5	208
